# Supplementary material for: Total and Mitochondrial Transcriptomic and Proteomic Insights into Regulation of Bioenergetic Processes for Shoot Fast-Growth Initiation in Moso Bamboo
Source: MDPI journal article supplement (doi:10.3390/cells11071240), 2022-04-06
Supplement: s1 [file s1]

# **Total and mitochondrial transcriptomic and proteomic insights into regulation of bioenergetic processes for shoot fast growth initiation in Moso bamboo**

Xiaojing Wang <sup>1</sup>, Xin Geng <sup>1</sup>, Lilin Yang <sup>2</sup>, Yuzhen Chen <sup>1</sup>, Zhiheng Zhao <sup>1</sup>, Weijia Shi <sup>1</sup>, Lan Kang <sup>1</sup>, Ruihua Wu <sup>1</sup>, Cunfu Lu <sup>1\*</sup>, and Jian Gao <sup>3\*</sup>

<sup>1</sup> College of Biological Sciences and Technology, National Engineering Laboratory for Tree Breeding, Beijing Forestry University, Beijing, China, 100083

<sup>2</sup> College of Agriculture and Forestry Engineering and Planning, Tongren University, Tongren, China, 554300

<sup>3</sup> International Center for Bamboo and Rattan, Key Laboratory of Bamboo and Rattan Science and Technology, State Forestry and Grassland Administration, Beijing, China, 100102

## **Supplementary Methods**

### **Method S1. Measurements of mitochondrial respiration rate and glycolysis rate**

The single tissue disc (2.5-mm-diameter and 200-μm-thickness) used for testing was freshly cut from the middle part of bamboo shoots. The respiration buffer (5 mM KH<sub>2</sub>PO<sub>4</sub>, 10 mM TES, 10 mM NaCl, 2 mM MgSO<sub>4</sub>, pH 7.2) was added to the wells. Where indicated, inhibitors were added to the medium with a final concentration of 50 mM NaN<sub>3</sub> or 5 mM SHAM. The OCR and ECAR of the single shoots tissue disc were recorded by Seahorse XF Acquisition and Analysis Software (Wave 2.6.1, Seahorse Bioscience).

### **Method S2. Mitochondrial isolation**

The outer leaf sheaths of bamboo shoots were carefully peeled off manually prior to treatment. About 4 cm was removed from the cut end of each shoot with a sharp kitchen knife. Plant tissues were homogenized at 4 °C in extraction buffer (1.25 M NaCl, 0.3 M Sucrose, 50 mM Tris-HCl, 5 mM EDTA, 2 mM EGTA, 0.5% [w/v] BSA, 0.5% [w/v] PVP-40, and 15 mM thioglycol, pH 8.0) with a homogenizer (200 mL of buffer for 150 g of plant tissues, ten bursts

of 5 s, speed 18000 r min<sup>-1</sup>). The nuclei from this homogenate were sedimented (1500 g for 5 min at 4 °C, two times), chloroplast was sedimented from the supernatant by centrifugation (6,000 g for 10 min at 4 °C, two times). Mitochondria were sedimented from the supernatant by centrifugation (15,000 g for 15 min at 4 °C). The pellet was resuspended in wash buffer (0.35 M Sucrose, 25 mM EDTA, and 50 mM Tris-HCl, pH 8.0) and layered on a discontinuous sucrose gradient (from bottom to top: 40% and 23% [w/v]). The gradient was centrifuged at 20,000 g for 45 min at 4 °C. The mitochondrial fraction was collected from the interface between the two sucrose cushions, diluted with wash buffer and washed once. The purified mitochondrial pellet was finally resuspended in wash buffer.

### **Method S3. Mitochondrial activity detection**

The purified mitochondrial suspension and 0.4% [w/v] Janus green B were mixed (1:1, v/v). After staining at room temperature for 30 minutes, mitochondria were observed with DMIL LED inverted microscope (Leica, Frankfurt, Germany). The active mitochondria showed a distinct blue-green color (Figure S2A, S2B). The purified mitochondrial suspension and 1mM Rhodamine 123 were mixed (1:1, v/v) at 30 °C in dark for 5 min and observed under a laser scanning confocal microscope (Nikon, Tokyo, Japan) (excitation wavelength/emission wavelength, 507/529 nm). The active mitochondria emitted a distinct yellow-green fluorescence (Figure S2C, S2D).

### **Method S4. Mitochondrial count**

Here, the purified mitochondrial fractions were prepared respectively as mentioned above using the same quality (150 g) of tissues from the middle part of winter shoot and spring shoot, then resuspended in 2 ml wash buffer and labeled with Rhodamine 123 (1mM; 2ml), finally counted and analyzed by CytoFLEX flow cytometry (Beckman Coulter, USA) and CytExpert software (Beckman Coulter).

### **Method S5. Quantitative verification of targeted protein by PRM**

Protein extraction and tryptic digestion were performed in the same way as in the Label-free experiment. MS data acquisition was first performed in DDA mode to obtain MS/MS spectra for the 40 most abundant precursor ions following each survey MS1 scan in each cycle. Protein Pilot software was used to identify proteins, and the database searching results were brought into Skyline software for spectra library building. Target proteins for PRM validation were

imported to the software Skyline, and the peptides for protein quantification were selected according to the ion signals in spectra library. A list of associated peptides containing  $m/z$  values and retention times was exported from Skyline, and imported to MS control software Analyst for PRM acquisition method construction. PRM method was run against the mitochondrial samples, evaluated and refined to develop the highest quality assay. Data collection of each sample was performed using the final PRM acquisition method on the mass spectrometer, where each precursor ion was selected by the quadrupole, fragmented, and then all fragment ions were quantified in the mass analyzer. Data processing was done in Skyline, and the quantification results were manually inspected for each peptide of the targeted proteins. All proteins with a  $P$ -value below 0.05 and a fold change larger than 1.5 were considered significant.

#### **Method S6. Detection of electrolyte leakage rate**

Briefly, Arabidopsis seedlings (100 mg) were collected and soaked in 8 ml distilled water at room temperature for 10 h, the initial conductivity (C1) was determined using a conductivity meter. Then sample was boiled for 30 minutes, and the final conductivity (C2) was measured after sample cooling to room temperature. The electrolyte leakage rate was calculated according to  $ELR (\%) = C1/C2 \times 100$ .

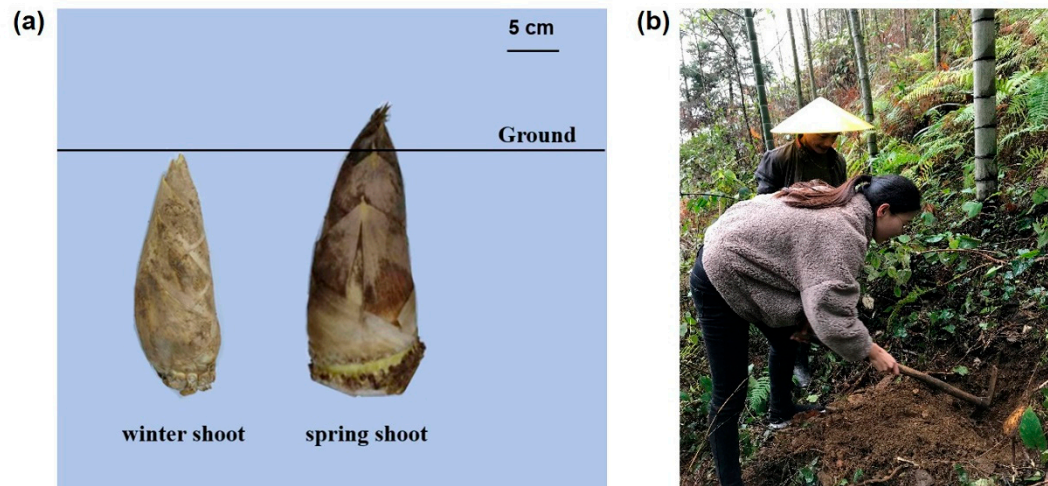

**Figure S1. Moso bamboo shoots in different development stages.** (a) Winter and spring shoots. (b) Sampling in the Moso bamboo forest.

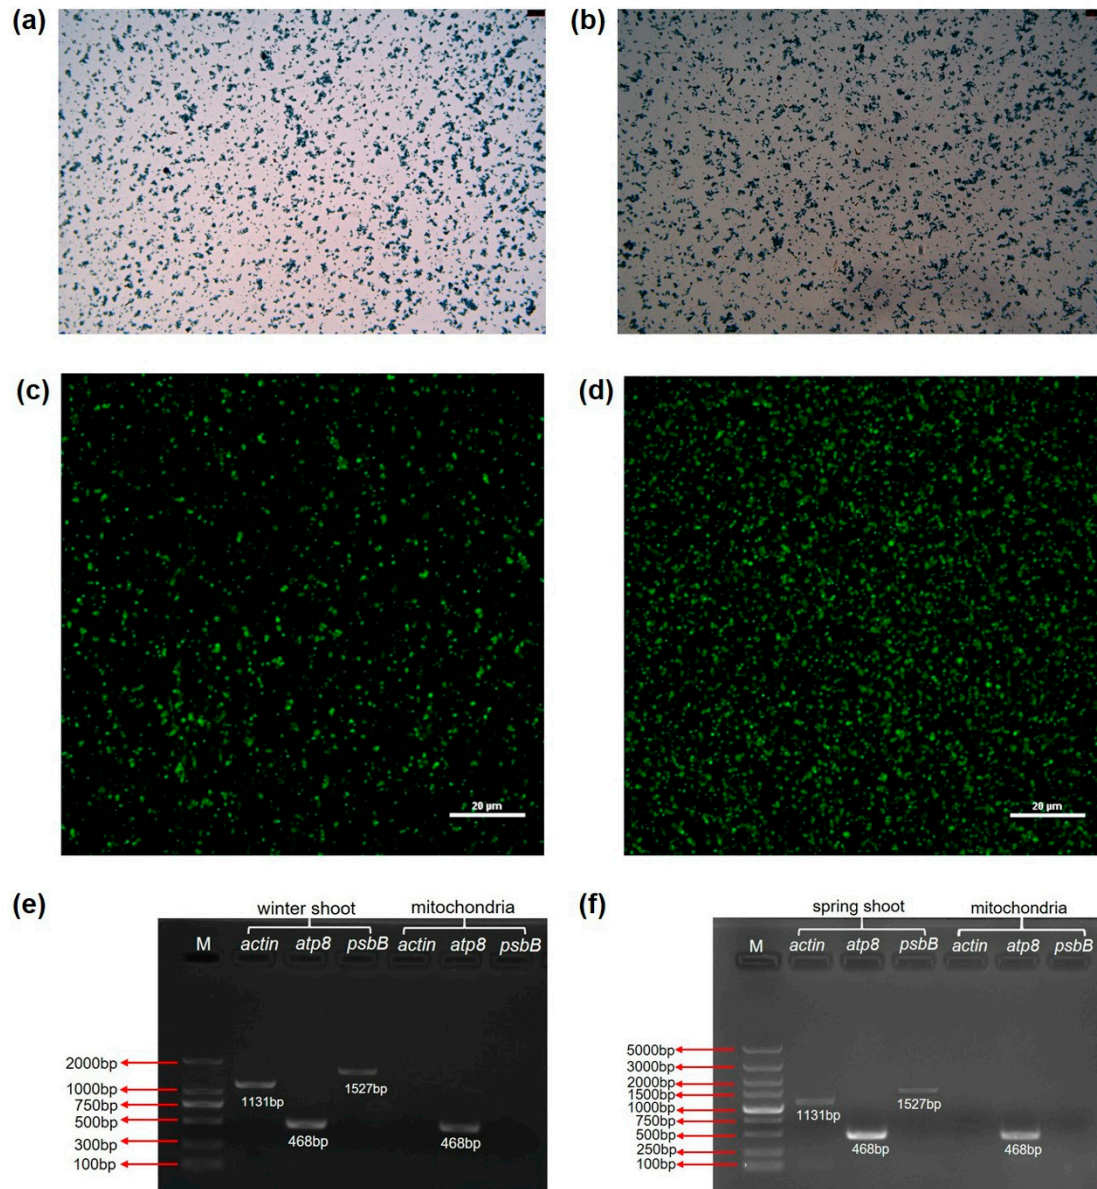

**Figure S2. Activity and purity identification of mitochondria isolated from Moso bamboo shoots.** The activated mitochondria from winter shoot (a) and spring shoot (b) stained with Janus green B were observed under light microscope, and the length of the black bar in the upper right corner is 100  $\mu\text{m}$ . The activated mitochondria from winter shoot (c) and spring shoot (d) stained with Rhodamine 123 were observed under confocal laser microscope, and the white line at the bottom right represents 20  $\mu\text{m}$ . Mitochondrial purity identification of winter shoot (e) and spring shoot (f) by PCR amplification of organelle specific genes.

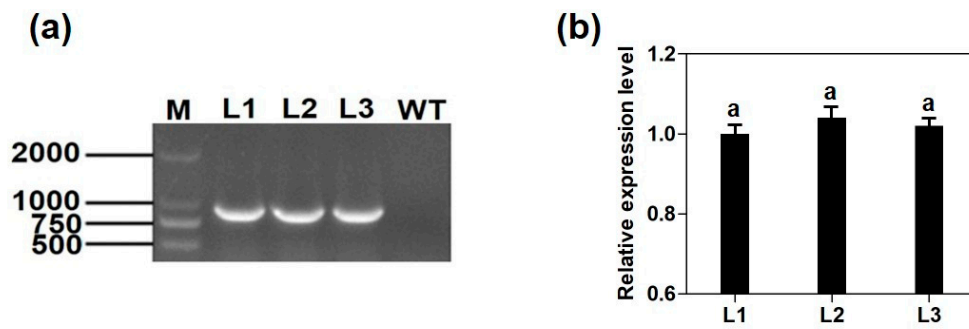

**Figure S3. RT-PCR identify and expression analysis of *PeAOX1b* transgenic Arabidopsis T3 homozygous lines.** (a) RT-PCR identify of *PeAOX1b* transgenic Arabidopsis T3 homozygous lines. (b) The relative expression level of three transgenic Arabidopsis lines. M: 2000 bp Maker; WT: Wild type Arabidopsis; L1-L3: Transgenic Arabidopsis. Significant difference criteria:  $P < 0.05$ .

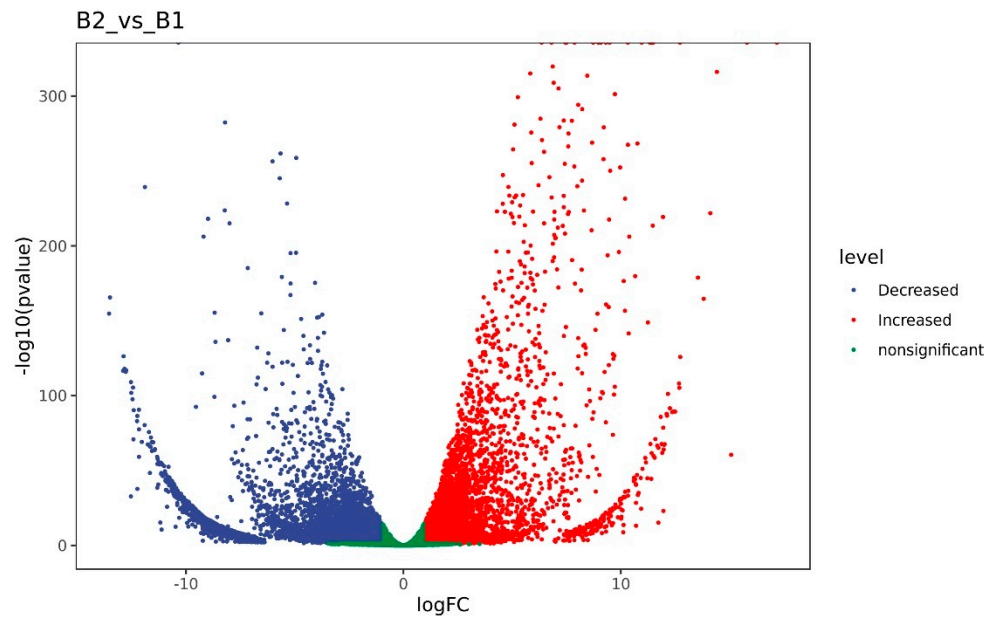

**Figure S4. Volcano plot of differentially expressed genes.** X-axis and Y-axis present threshold value in log transform. Each dot is a DEG. Dots in red and blue mean significantly up-regulated and down-regulated DEGs which passed screening threshold and green dots are non-significant DEGs. Abbreviation: B1, winter shoot; B2, spring shoot

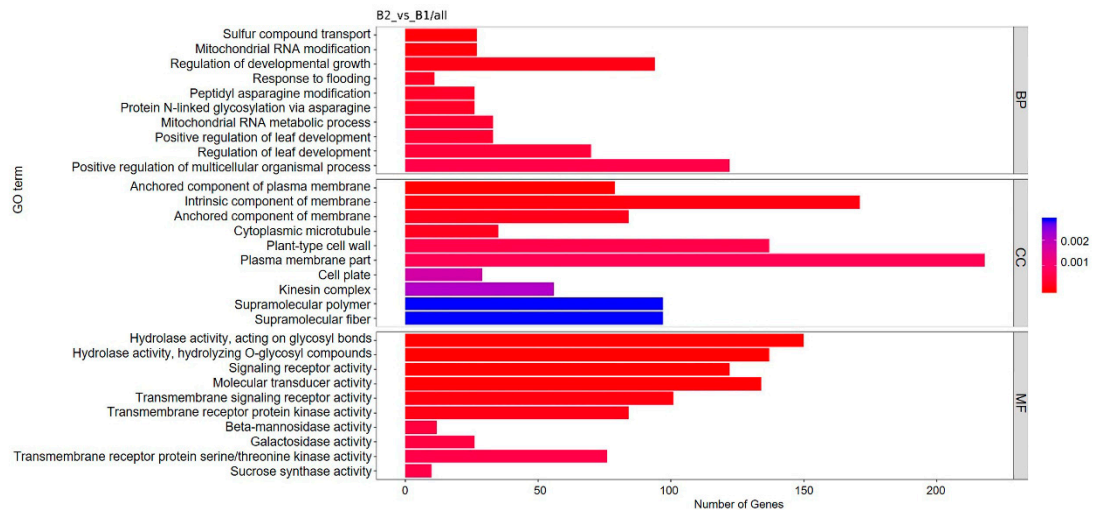

**Figure S5. GO functional enrichment analysis of DEGs in total transcriptome.** X axis means number of DEGs. Y axis represents GO terms. All GO terms are grouped in to three ontologies: BP (biological process), CC (cellular component), MF (molecular function). Gradient color barcode at the right indicates  $p$ -value, and less  $p$ -value means greater intensiveness. We just display the top 10 of enriched GO terms in each group. Abbreviation: B1, winter shoot; B2, spring shoot.



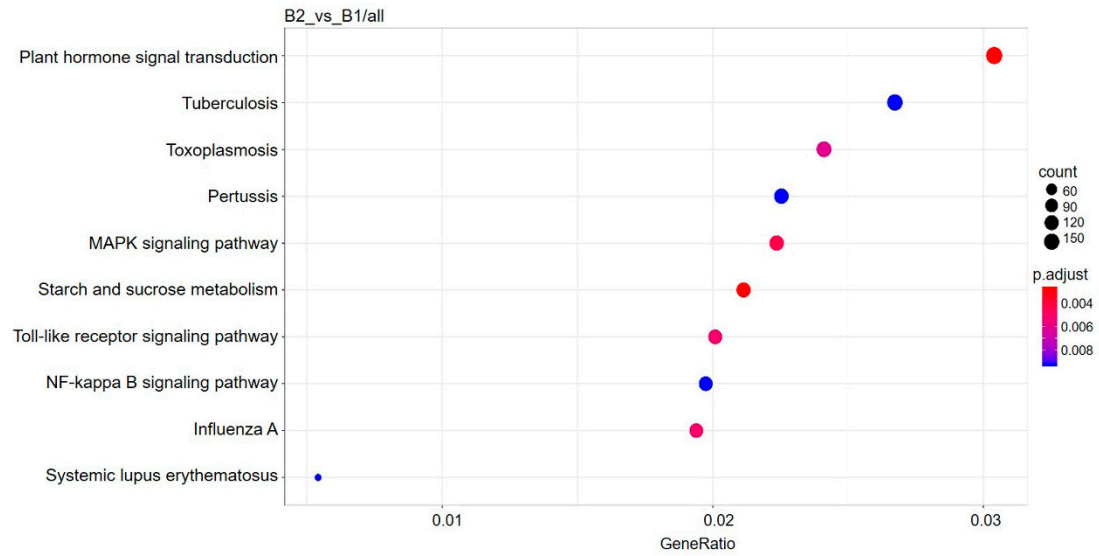

**Figure S6. KEGG functional enrichment analysis of DEGs in total transcriptome.** X axis means GeneRatio. Y axis represents KEGG pathway terms. GeneRatio is the ratio of DEG numbers annotated in this pathway term to all gene numbers annotated in this pathway term. Greater GeneRatio means greater intensiveness. The number of DEGs is represented by the size of the circle, and the larger circle means the more DEGs. P.adjust is corrected *p*-value ranging from 0~1, and less p.adjust means greater intensiveness. We just display the top 10 of enriched pathway terms. Abbreviation: B1, winter shoot; B2, spring shoot.

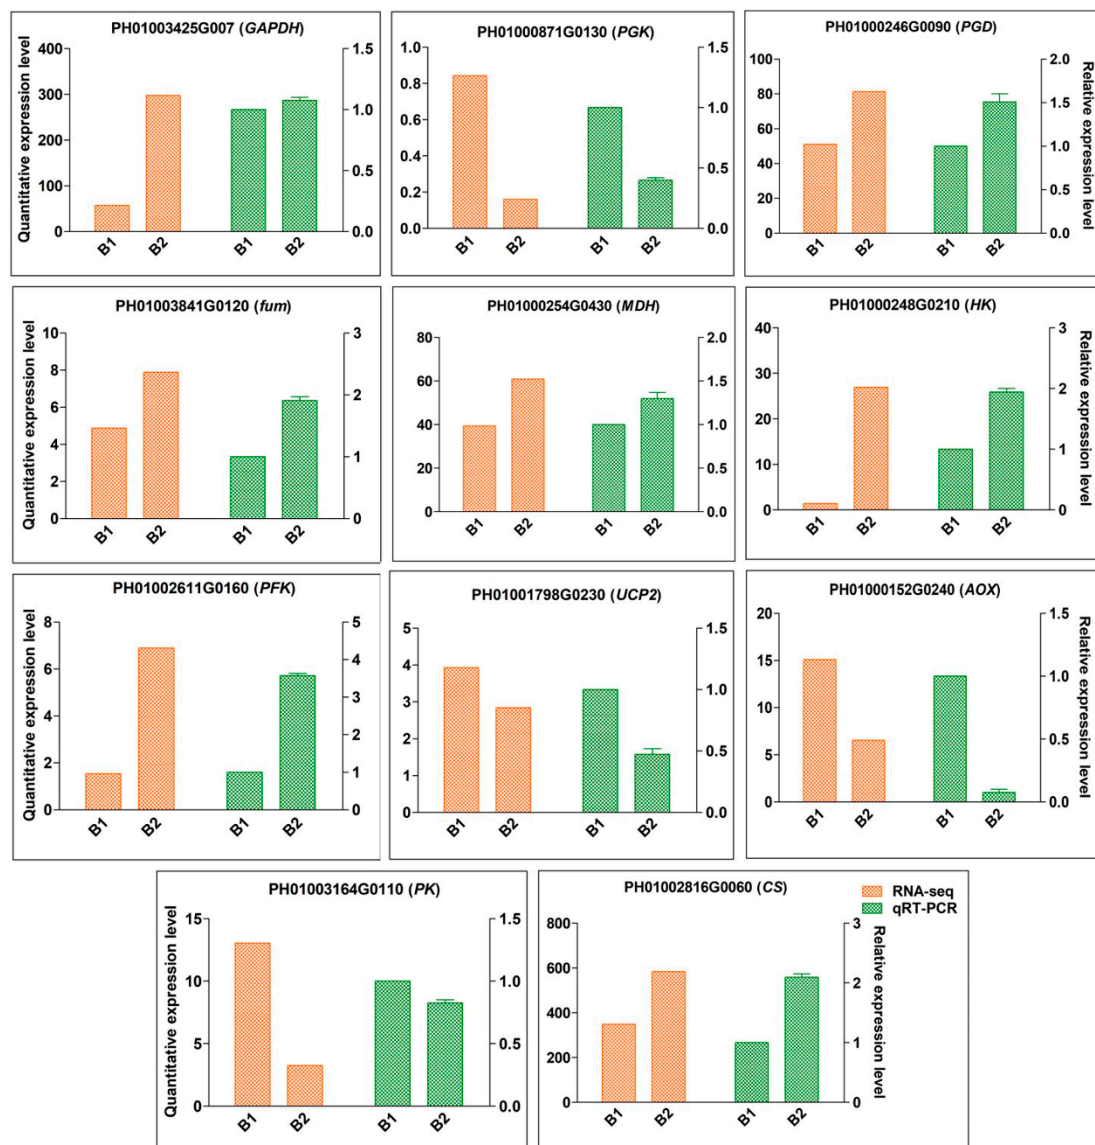

**Figure S7. Relative expression level of carbohydrate metabolism genes at two time points of Moso bamboo shoots development detected by RNA-seq and RT-qPCR.** Abbreviation: B1, winter shoot; B2, spring shoot.

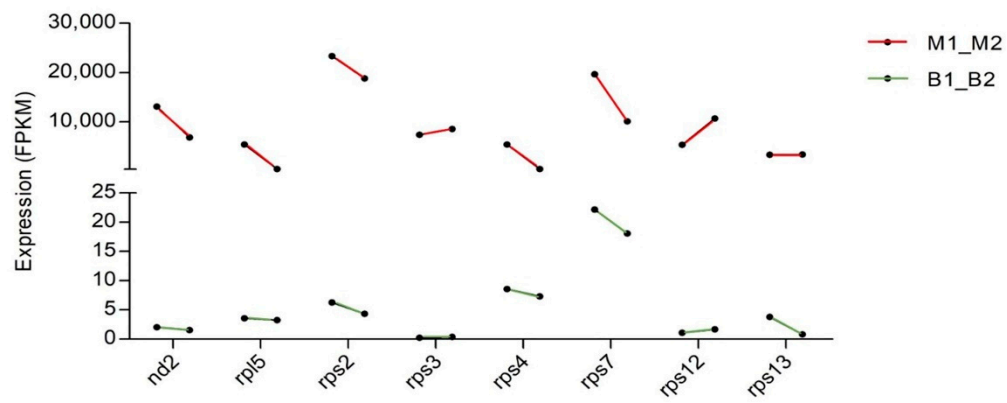

**Figure S8. Expression level of co-expressed mitochondrial genes in total and mitochondrial transcriptome.** Abbreviations: M1, winter shoot mitochondria; M2, spring shoot mitochondria; B1, winter shoot; B2, spring shoot

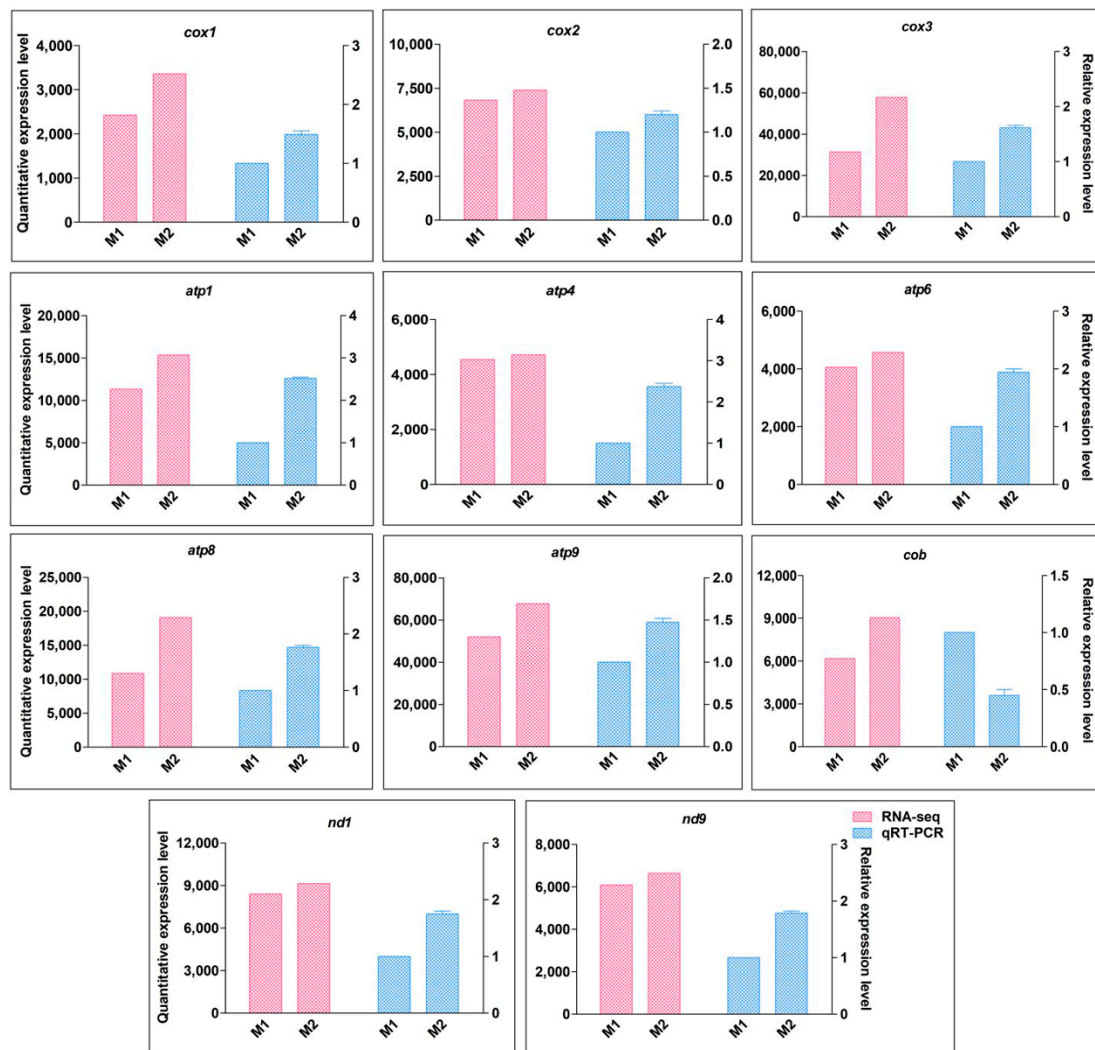

**Figure S9. Relative expression level of energy metabolism genes at two time points of Moso bamboo mitochondria detected by RNA-seq and RT-qPCR.** Abbreviation: M1, winter shoot mitochondria; M2, spring shoot mitochondria.

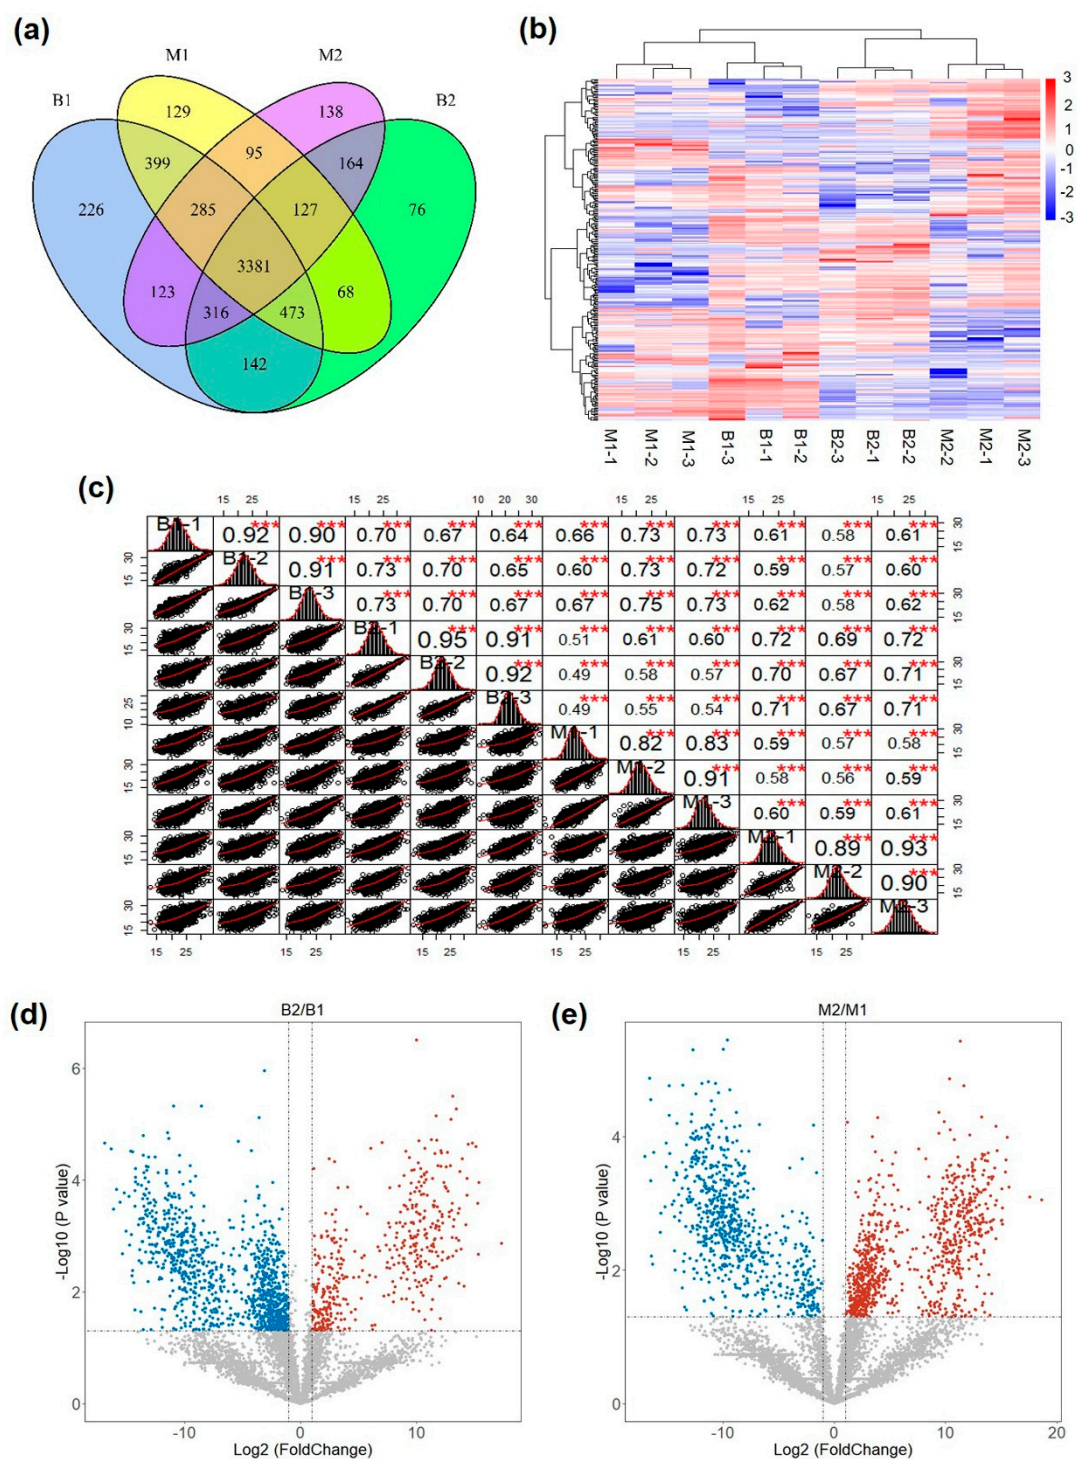

**Figure S10. Overview of Label-free quantitative analysis of total and mitochondrial proteome.** (a) The number of proteins identified in different samples. (b) The global expression profile of proteins identified in different samples. The color scale (−3.0 to 3.0) represents the Z-score calculated. Red represents up-regulated expression and blue represents down-regulated expression. (c) Quantitative correlation analysis between samples. (d) Volcano plot of DEPs in total proteome. (e) Volcano plot of DEPs in mitochondrial proteome. For volcano plot, X-axis

and Y-axis present threshold value in log transform. Each dot is a DEG. Dots in red and blue mean significantly up-regulated and down-regulated DEGs which passed screening threshold and gray dots are non-significant DEGs. Abbreviation: B1, winter shoot; B2, spring shoot; M1, winter shoot mitochondria; M2, spring shoot mitochondria.



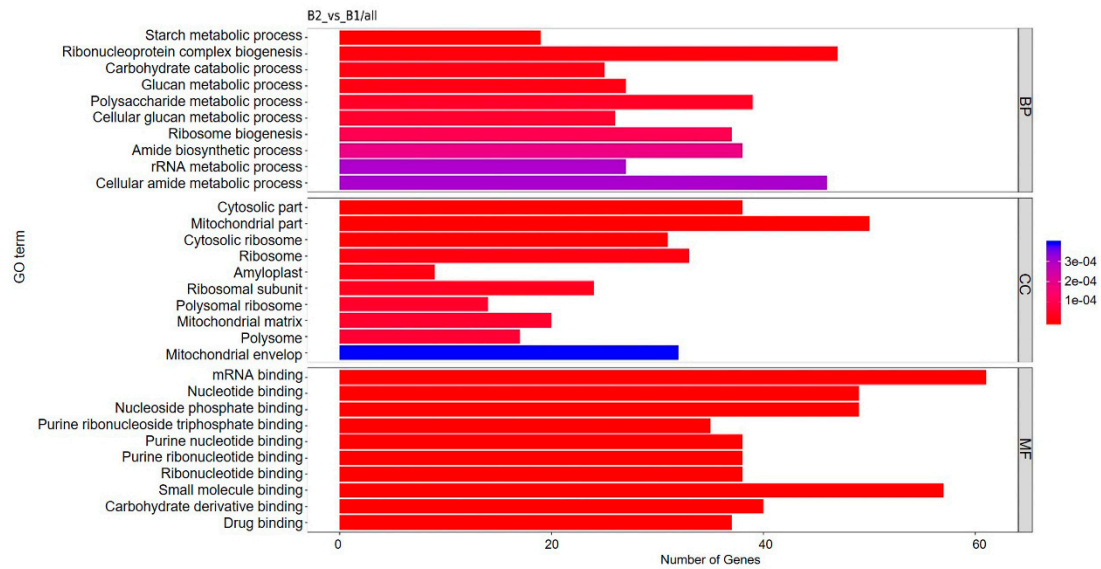

**Figure S11. GO functional enrichment analysis of DEPs in total proteome.** X axis means number of DEPs. Y axis represents GO terms. All GO terms are grouped in to three ontologies: BP (biological process), CC (cellular component), MF (molecular function). Gradient color barcode at the right indicates *p*-value, and less *p*-value means greater intensiveness. We just display the top 10 of enriched GO terms in each group. Abbreviation: B1, winter shoot; B2, spring shoot.

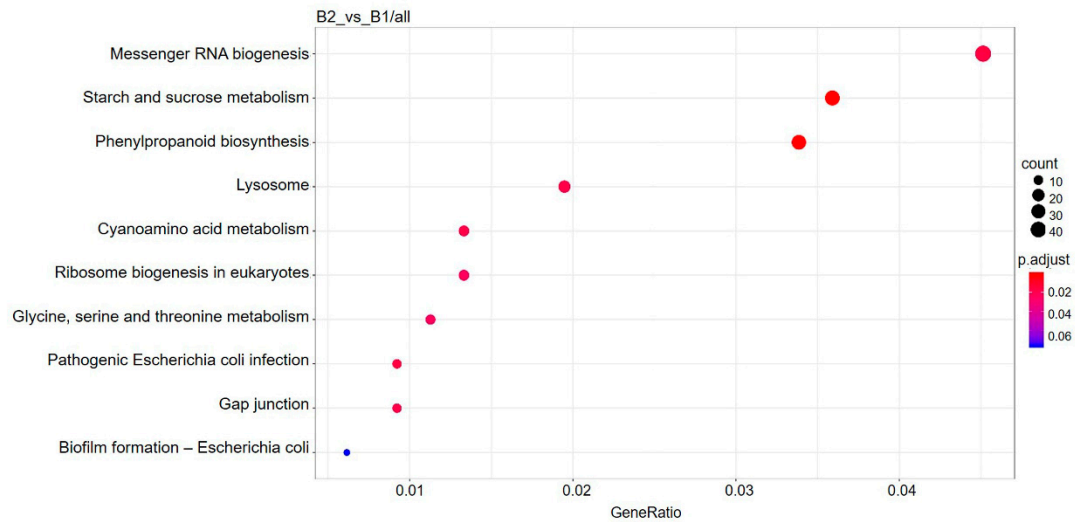

**Figure S12. KEGG functional enrichment analysis of DEPs in total proteome.** X axis means GeneRatio. Y axis represents KEGG pathway terms. GeneRatio is the ratio of DEP numbers annotated in this pathway term to all protein numbers annotated in this pathway term. Greater GeneRatio means greater intensiveness. The number of DEPs is represented by the size of the circle, and the larger circle means the more DEPs. P.adjust is corrected *p*-value ranging from 0~1, and less p.adjust means greater intensiveness. We just display the top 10 of enriched pathway terms. Abbreviation: B1, winter shoot; B2, spring shoot.



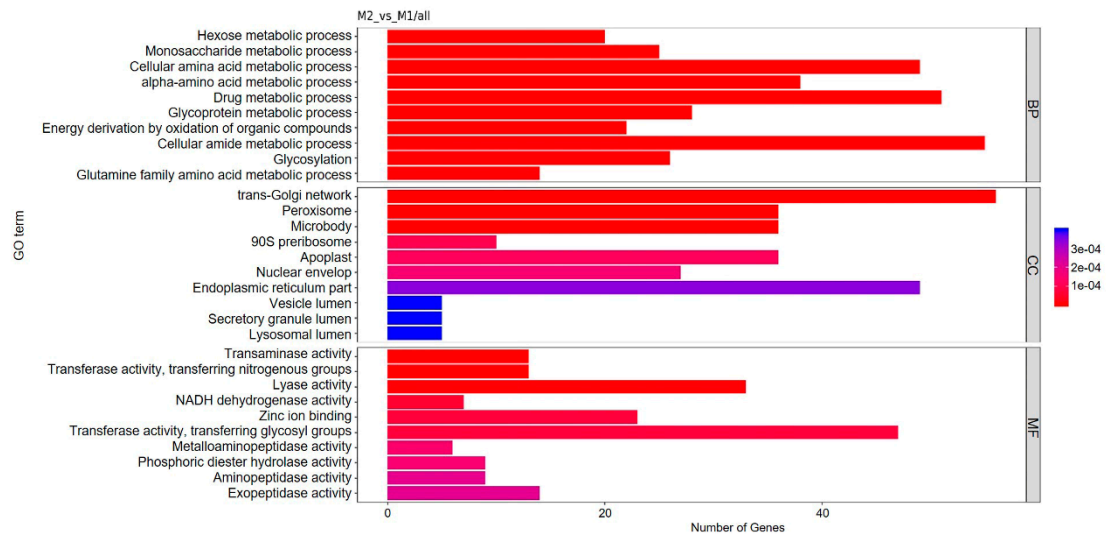

**Figure S13. GO functional enrichment analysis of DEPs in mitochondrial proteome.** X axis means number of DEPs. Y axis represents GO terms. All GO terms are grouped in to three ontologies: BP (biological process), CC (cellular component), MF (molecular function). Gradient color barcode at the right indicates  $p$ -value, and less  $p$ -value means greater intensiveness. We just display the top 10 of enriched GO terms in each group. Abbreviation: M1, winter shoot mitochondria; M2, spring shoot mitochondria.

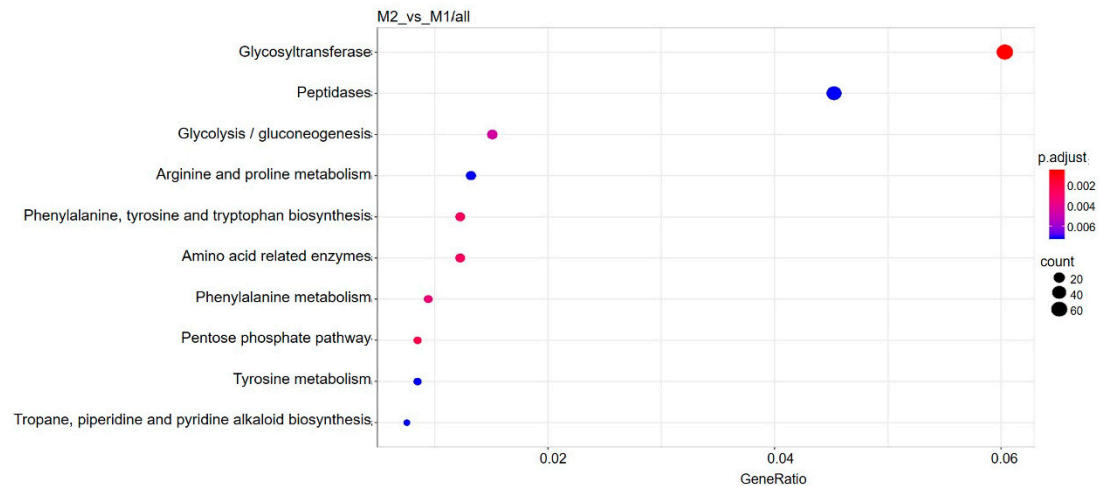

**Figure S14. KEGG functional enrichment analysis of DEPs in mitochondrial proteome.**

X axis means GeneRatio. Y axis represents KEGG pathway terms. GeneRatio is the ratio of DEP numbers annotated in this pathway term to all protein numbers annotated in this pathway term. Greater GeneRatio means greater intensiveness. The number of DEPs is represented by the size of the circle, and the larger circle means the more DEPs. P.adjust is corrected *p*-value ranging from 0~1, and less p.adjust means greater intensiveness. We just display the top 10 of enriched pathway terms. Abbreviation: M1, winter shoot mitochondria; M2, spring shoot mitochondria.

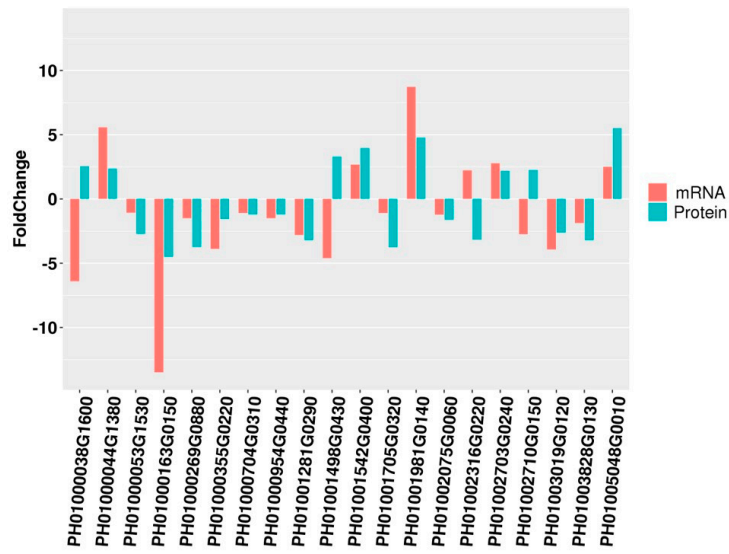

**Figure S15. Expression analysis of the top 20 differentially expressed correlations (DECs) with the highest significance.**

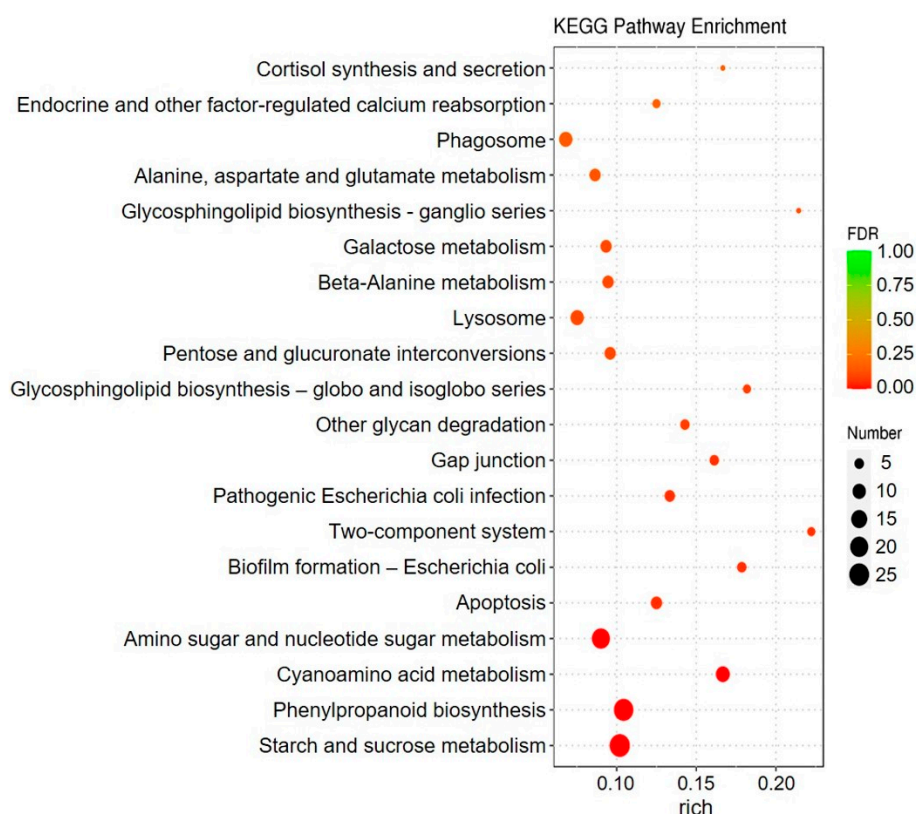

**Figure S16. KEGG functional enrichment analysis of the differentially expressed correlations (DECs).** X axis indicates rich factor. Y axis means KEGG pathway terms. Rich factor is the ratio of DEC numbers annotated in this term to all gene numbers annotated in this term. Greater rich factor represents greater intensiveness. The number of DECs is represented by the size of the circle, and the larger circle means the more DECs. FDR is false discovery rate ranging from 0~1, and less FDR means greater intensiveness. We just display the top 20 of enriched terms.

**Table S1. Primers of organelle specific genes for mitochondrial purity identification.**

| Unigene  | Forward Primer (5' - 3') | Reverse primer 5' - 3' |
|----------|--------------------------|------------------------|
| Pe-actin | ATGGCTGAAGAGGATATCCAG    | CTAGAAACACTTCATATGGAC  |
| Pe-atp8  | ATGCCTCAACTTGATAAATT     | TTAGATTATGCTTCCTTGCC   |
| Pe-psbB  | ATGGGTTTGCCTTGGTATCGT    | TCAGACTGCCTGTCTCCTTGT  |

**Table S2. Primers used in RT-qPCR.**

| Target unigene                   | Forward Primer (5' - 3') | Reverse primer (5' - 3') |
|----------------------------------|--------------------------|--------------------------|
| <b>For bamboo shoots samples</b> |                          |                          |
| actin                            | GGTGTGAGCCATACTGTGCCCAT  | TTCCCGTTCAGCAGAGGTTGTG   |
| TIP41                            | CATTGCTAGCTTGTCTGCG      | CACGGGAAAGGTGTGTTAGC     |
| GAPDH                            | CTCAAGCAAGGACTGGAGGG     | CGGTCAGGTCAACGACAGAA     |
| PGK                              | CCCACCATCAAGCACCTCAT     | ACCTGTACGCCAAGAAGCTC     |
| PGD                              | GGGATGGGTGTTTCTGGAGG     | ATGGGCCACTATCAGGGACT     |
| Fum                              | ATGACATTGCTTGTCTGGGA     | TGCCCATTGCAACCACCTAC     |
| MDH                              | GACCTATTCAACATCAACGCCG   | GGTCACACCAAACAGCTTCTTC   |
| HK                               | GCCATGGAGAAGCAAGGTCT     | CCTTTTCGACATAAGCGGCG     |
| PFK                              | ACCAGCGTTGTTGGCATAGA     | GTCTCCCCCTTGAAGTTCCG     |
| UCP2                             | TGGACCGAACATTGCACGTA     | GCACCCAAACCAGCAAAGAG     |
| AOX                              | AATGATGCGCATGAAAGGCC     | AGCAGCTCCATTGGCATCAA     |
| PK                               | GGTGTGTGGTCTAAGCCGAA     | GGTGTGATGCATGGTCTCCA     |
| CS                               | GTTATCTCAACACCGCCCCA     | TTGTGAACTCCCAGTCTGCC     |
| <b>For mitochondrial samples</b> |                          |                          |
| rps13                            | GAAGAGGGGAGAACGAGCAG     | TGAGTTCGTTGACCGCGTAA     |
| ccmFC                            | TTACTTCCATGGTCGTGCCC     | CAAACAAGCACCACTCGACG     |
| cox1                             | TGGGATTCGTCGTTTCTTCGT    | AAGTATGAAAGGCTGGAGGGC    |
| cox2                             | CTTTGTGATGCTGCGGAACC     | AATGCCATAAAGCGCGAACC     |
| cox3                             | ATTCTTCTTTGGCACCTACGGT   | GCGTAAACAGCTCGTTTTTCCT   |
| atp1                             | AGATCGGTGCGAGTGGTCTCA    | TCCAGTGCGCTTGACAAGAT     |
| atp4                             | TGCGAAAAGACAGTGCAAGC     | AGCTTTGAACGTAGACCCGG     |
| atp6                             | GCAGCAAAATGGGGCTTCAA     | GACCAAACCGAGAGTGAGCA     |
| atp8                             | GGGAACAAGATCCGGAGCAA     | CCATTCCTCGTGAGCCACTT     |
| atp9                             | ATCAATAGGTGCCGGAGCTG     | CAATGATGGATTTTCGCGCCA    |
| cob                              | TGTTCCGGTGCTCGGAGTTG     | AGAAACCACCCCAAAGCCAA     |
| nd1                              | AGCATTACGATCTGCAGCTCA    | CCAATACGGGGAACAAGGGAA    |
| nd9                              | AATCATCCGGATTACGCCGTA    | TGGGTCATCTCAATGGGTTCAG   |

**Table S3. Respiratory ratio of winter and spring shoot before and after the addition of different inhibitors.**

| Time (min) | Sequential additions | OCR (pmol min <sup>-1</sup> ) |                           |
|------------|----------------------|-------------------------------|---------------------------|
|            |                      | Winter shoot                  | Spring shoot              |
| 78.36      | Before additions     | 143.25±32.89 <sup>a</sup>     | 198.18±20.98 <sup>a</sup> |
| 91.12      | NaN <sub>3</sub>     | 92.03±23.51 <sup>b</sup>      | 134.48±29.09 <sup>b</sup> |
| 116.55     | SHAM                 | 60.82±18.59 <sup>c</sup>      | 108.11±20.22 <sup>c</sup> |

OCR, oxygen consumption rate; NaN<sub>3</sub>, cytochrome c oxidase (COX) respiratory pathway inhibitor sodium azide; SHAM, alternative oxidase (AOX) respiratory pathway inhibitor salicylhydroxamic acid. The mean and standard deviation (SD) were calculated from three biological replicates. The letters a, b, c in the table indicate significant differences between the same column of data ( $P < 0.05$ ).

**Table S4. Summary of sequencing data of total transcriptome and alignment information of clean reads.**

| Sample        | Raw data<br>base (bp) | Clean data<br>base (bp) | Raw data<br>reads | Clean data<br>reads | Total<br>clean<br>reads | Total<br>mapping<br>ratio (%) | Uniquely<br>mapping<br>ratio (%) |
|---------------|-----------------------|-------------------------|-------------------|---------------------|-------------------------|-------------------------------|----------------------------------|
| B1_1          | 5,725,652,100         | 4,978,328,916           | 38,171,014        | 36,754,224          | 35,064,600              | 90.21%                        | 86.93%                           |
| B1_2          | 7,594,477,200         | 6,580,675,249           | 50,629,848        | 48,447,218          | 40,457,496              | 86.34%                        | 83.27%                           |
| B1_3          | 9,291,500,100         | 8,042,215,023           | 61,943,334        | 59,235,322          | 49,620,884              | 86.21%                        | 83.05%                           |
| B2_1          | 4,074,935,100         | 3,553,398,487           | 27,166,234        | 26,178,356          | 23,980,918              | 90.13%                        | 86.92%                           |
| B2_2          | 7,582,074,600         | 6,473,773,868           | 50,547,164        | 47,899,098          | 36,381,450              | 82.85%                        | 78.86%                           |
| B2_3          | 8,814,375,900         | 7,580,801,613           | 58,762,506        | 55,965,190          | 42,162,828              | 83.51%                        | 79.56%                           |
| Mean<br>value | 7,180,502,500         | 6,201,532,193           | 47,870,017        | 45,746,568          | 37,944,696              | 86.54%                        | 83.10%                           |



**Table S5. DEGs related to starch and sucrose metabolism in total transcriptome.**

| Gene ID                                         | Level          | Log FC   | Gene ID                                               | Level          | Log FC   |
|-------------------------------------------------|----------------|----------|-------------------------------------------------------|----------------|----------|
| <b>Invertase (INV)</b>                          |                |          | <b>Amylase (AMY)</b>                                  |                |          |
| PH01000019G0910                                 | Up regulated   | 4.77303  | PH01001272G0030                                       | Up regulated   | 2.67567  |
| PH01000019G0990                                 | Up regulated   | 4.04906  | PH01000378G0910                                       | Up regulated   | 2.43842  |
| PH01000019G0920                                 | Up regulated   | 4.46995  | PH01001911G0350                                       | Up regulated   | 1.71811  |
| PH01001102G0470                                 | Up regulated   | 1.95003  | PH01000378G0940                                       | Up regulated   | 1.00011  |
| <b>Fructokinase (scrK)</b>                      |                |          | PH01000010G1130                                       | Up regulated   | 4.08091  |
| PH01000235G0540                                 | Up regulated   | 2.35270  | PH01000560G0630                                       | Up regulated   | 10.11074 |
| <b>Glucose-6-phosphate isomerase (GPI)</b>      |                |          | PH01000171G0500                                       | Up regulated   | 3.73910  |
| PH01000589G0720                                 | Up regulated   | 1.64176  | PH01000585G0580                                       | Up regulated   | 1.21965  |
| <b>Sucrose synthase (SUS)</b>                   |                |          | <b>Isoamylase (ISA)</b>                               |                |          |
| PH01008776G0020                                 | Up regulated   | 3.37165  | PH01000623G0280                                       | Down regulated | -4.08341 |
| PH01162702G0010                                 | Up regulated   | 3.32269  | PH01000507G0180                                       | Down regulated | -6.75418 |
| PH01007960G0010                                 | Up regulated   | 3.53161  | <b>Glucose-1-phosphate adenylyltransferase (glgC)</b> |                |          |
| PH01001102G0130                                 | Up regulated   | 1.79413  | PH01000983G0230                                       | Down regulated | -3.77544 |
| <b>Trehalose 6-phosphate synthase (TPS)</b>     |                |          | PH01003937G0060                                       | Down regulated | -2.69411 |
| PH01002176G0130                                 | Up regulated   | 2.05552  | PH01001244G0260                                       | Down regulated | -1.96907 |
| PH01002098G0280                                 | Up regulated   | 1.08285  | PH01000903G0520                                       | Down regulated | -2.74907 |
| PH01001492G0440                                 | Up regulated   | 1.56593  | PH01004879G0040                                       | Down regulated | -4.85015 |
| PH01000453G0440                                 | Up regulated   | 1.04673  | PH01001253G0400                                       | Down regulated | -1.10561 |
| PH01000798G0100                                 | Up regulated   | 1.25648  | <b>Starch synthase (glgA)</b>                         |                |          |
| <b>Trehalose 6-phosphate phosphatase (TPP)</b>  |                |          | PH01000804G0500                                       | Down regulated | -2.08870 |
| PH01002176G0130                                 | Up regulated   | 2.05552  | PH01000135G1340                                       | Down regulated | -1.08300 |
| PH01002098G0280                                 | Up regulated   | 1.08285  | PH01001914G0350                                       | Down regulated | -1.76234 |
| PH01001492G0440                                 | Up regulated   | 1.56593  | PH01000065G1160                                       | Down regulated | -3.41950 |
| PH01000453G0440                                 | Up regulated   | 1.04673  | PH01000814G0170                                       | Down regulated | -1.22160 |
| PH01000798G0100                                 | Up regulated   | 1.25648  | <b>Cellulase (CELB)</b>                               |                |          |
| <b>Alpha, alpha-trehalase (TRE)</b>             |                |          | PH01001459G0050                                       | Down regulated | -1.85693 |
| PH01000362G0480                                 | Up regulated   | 1.60479  | PH01000332G1080                                       | Down regulated | -2.19068 |
| <b>Glycogen synthase (GYS)</b>                  |                |          | PH01003005G0220                                       | Down regulated | -4.49288 |
| PH01001692G0230                                 | Down regulated | -1.24309 | PH01001590G0100                                       | Down regulated | -2.56356 |
| <b>Granule-bound starch synthase (WAXY)</b>     |                |          | <b>Beta-glucosidase (bglB)</b>                        |                |          |
| PH01000269G0880                                 | Down regulated | -1.49334 | PH01000513G0030                                       | Down regulated | -5.08625 |
| <b>1,4-alpha-glucan branching enzyme (GBE1)</b> |                |          | PH01002028G0390                                       | Down regulated | -3.22951 |
| PH01000019G0310                                 | Down regulated | -3.94720 | PH01002028G0330                                       | Down regulated | -5.92525 |
| PH01002662G0130                                 | Down regulated | -1.71463 | PH01005398G0010                                       | Down regulated | -2.47312 |
| PH01002470G0090                                 | Down regulated | -4.47197 | PH01000650G0660                                       | Down regulated | -1.26806 |
| PH01001371G0200                                 | Down regulated | -1.18469 | PH01000650G0640                                       | Down regulated | -2.01122 |
| <b>4-alpha-glucanotransferase (malQ)</b>        |                |          |                                                       |                |          |
| PH01000936G0470                                 | Down regulated | -3.98938 |                                                       |                |          |
| PH01000068G1680                                 | Down regulated | -1.78807 |                                                       |                |          |

**Table S6. Summary of sequencing data of mitochondrial transcriptome and alignment information of clean reads.**

| Sample     | Total clean reads | Mitochondrial genome of <i>Bambusa Oldhamii</i> |                        |
|------------|-------------------|-------------------------------------------------|------------------------|
|            |                   | Total mapping ratio                             | Uniquely mapping ratio |
| M1_1       | 30,665,518        | 1.64%                                           | 1.62%                  |
| M1_2       | 37,327,478        | 2.55%                                           | 2.53%                  |
| M1_3       | 41,806,922        | 2.46%                                           | 2.43%                  |
| M2_1       | 29,416,610        | 2.00%                                           | 1.97%                  |
| M2_2       | 45,573,976        | 3.45%                                           | 3.44%                  |
| M2_3       | 44,839,246        | 3.41%                                           | 3.39%                  |
| Mean value | 38,271,625        | 2.62%                                           | 2.56%                  |

**Table S7. Comparison of protein-coding gene content between *Phyllostachys edulis* mitochondrial transcriptome and other grasses mitochondrial genomes.**

|                                | <i>Phyllostachys edulis</i><br>mitochondrial transcriptome | mitochondrial genomes   |                                  |                    |                          |                 |
|--------------------------------|------------------------------------------------------------|-------------------------|----------------------------------|--------------------|--------------------------|-----------------|
|                                |                                                            | <i>Bambusa oldhamii</i> | <i>Ferocalamus rimosivaginus</i> | <i>Oryza sativ</i> | <i>Triticum aestivum</i> | <i>Zea mays</i> |
| <b>Complex I</b>               |                                                            |                         |                                  |                    |                          |                 |
| <i>nd1,2,3,4, 4L,5,6,7,9</i>   | +                                                          | +                       | +                                | +                  | +                        | +               |
| <b>Complex II</b>              |                                                            |                         |                                  |                    |                          |                 |
| <i>sdh3, 4</i>                 | –                                                          | –                       | –                                | –                  | –                        | –               |
| <b>Complex III</b>             |                                                            |                         |                                  |                    |                          |                 |
| <i>cob</i>                     | +                                                          | +                       | +                                | +                  | +                        | +               |
| <b>Complex IV</b>              |                                                            |                         |                                  |                    |                          |                 |
| <i>cox1,2,3</i>                | +                                                          | +                       | +                                | +                  | +                        | +               |
| <b>Complex V</b>               |                                                            |                         |                                  |                    |                          |                 |
| <i>atp1,4,6,8,9</i>            | +                                                          | +                       | +                                | +                  | +                        | +               |
| <b>Cytochrome c biogenesis</b> |                                                            |                         |                                  |                    |                          |                 |
| <i>ccmB,C,FC,FN</i>            | +                                                          | +                       | +                                | +                  | +                        | +               |
| <b>Ribosomal</b>               |                                                            |                         |                                  |                    |                          |                 |
| <i>rpl2</i>                    | Φ                                                          | Φ                       | Φ                                | +                  | –                        | –               |
| <i>rpl5</i>                    | +                                                          | +                       | +                                | +                  | +                        | –               |
| <i>rpl16</i>                   | +                                                          | +                       | +                                | +                  | +                        | +               |
| <i>rps1,2,3,4,7,12,13</i>      | +                                                          | +                       | +                                | +                  | +                        | +               |
| <i>rps14</i>                   | Φ                                                          | Φ                       | Φ                                | Φ                  | Φ                        | –               |
| <i>rps19</i>                   | +                                                          | +                       | +                                | +                  | Φ                        | –               |
| <b>Other ORFs</b>              |                                                            |                         |                                  |                    |                          |                 |
| <i>matR</i>                    | +                                                          | +                       | +                                | +                  | +                        | +               |
| <i>mttB</i>                    | +                                                          | +                       | +                                | +                  | +                        | +               |

+, presence of the gene; –, absence of the gene; Φ, pseudogene.

**Table S8. DEPs related to starch and sucrose metabolism in total proteome.**

| Gene ID                                     | Level          | Log FC  | Gene ID                                               | Level          | Log FC  |
|---------------------------------------------|----------------|---------|-------------------------------------------------------|----------------|---------|
| <b>Trehalose 6-phosphate synthase (TPS)</b> |                |         | <b>Glucose-1-phosphate adenylyltransferase (glgC)</b> |                |         |
| PH01000007G2760                             | Down regulated | -2.563  | PH01003937G0060                                       | Down regulated | -1.962  |
| PH01000670G0310                             | Down regulated | -2.085  | PH01000983G0230                                       | Down regulated | -2.158  |
| <b>Granule-bound starch synthase (WAXY)</b> |                |         | <b>Starch synthase (glgA)</b>                         |                |         |
| PH01000439G0530                             | Down regulated | -10.116 | PH01000804G0500                                       | Down regulated | -3.654  |
| PH01000269G0880                             | Down regulated | -3.740  | PH01001914G0350                                       | Down regulated | -11.473 |
| <b>Beta-glucosidase (bglB)</b>              |                |         | PH01000065G1160                                       | Down regulated | -5.878  |
| PH01005398G0010                             | Up regulated   | 10.721  | PH01001203G0570                                       | Down regulated | -11.637 |
| PH01002028G0390                             | Up regulated   | 2.768   | <b>4-alpha-glucanotransferase (malQ)</b>              |                |         |
| PH01000513G0030                             | Up regulated   | 2.390   | PH01000936G0470                                       | Down regulated | -3.915  |
